# Supplementary material
Source: PubMed Central journal article supplement (PMC6675548)
Supplement: jciinsight-4-129781-s161.pdf [file jciinsight-4-129781-s161.pdf]

## Summary of Supplemental Figures and Tables

**Supplemental Figure 1.** Lipodystrophic *Bscl2*<sup>-/-</sup> mice develop cardiac hypertrophy and age-dependent cardiomyopathy.

**Supplemental Figure 2.** Global lipidomic analysis of ventricles from nonfasting 6 months old male *Bscl2*<sup>+/+</sup> and *Bscl2*<sup>-/-</sup> mice by shotgun mass spectrometry.

**Supplemental Figure 3.** BSCL2 deletion did not induce mitochondrial biogenesis, oxidative stress and ceramide-mediated lipotoxicity in hearts.

**Supplemental Figure 4.** ATGL inactivation ameliorates metabolic disorders in *Bscl2*<sup>-/-</sup> mice.

**Supplemental Figure 5.** Partial inactivation of ATGL ameliorates cardiac hypertrophic signaling, metabolic inflexibility and insulin resistance in *Bscl2*<sup>-/-</sup> mice.

**Table S1.** Differentially expressed genes (267) in hearts from 10 week old 4 h fasted female *Bscl2*<sup>+/+</sup> and *Bscl2*<sup>-/-</sup> mice with ( $0.5 < \text{Log } 2 < -0.5$ ), adjusted p value  $< 0.05$  (n=3 for each group pooled from 9 animals).

**Table S2.** Plasma parameters and echocardiographic variables in 6 months old male *A<sup>w</sup>B<sup>w</sup>*, *A<sup>w</sup>B<sup>k</sup>* and *A<sup>h</sup>B<sup>k</sup>* mice.

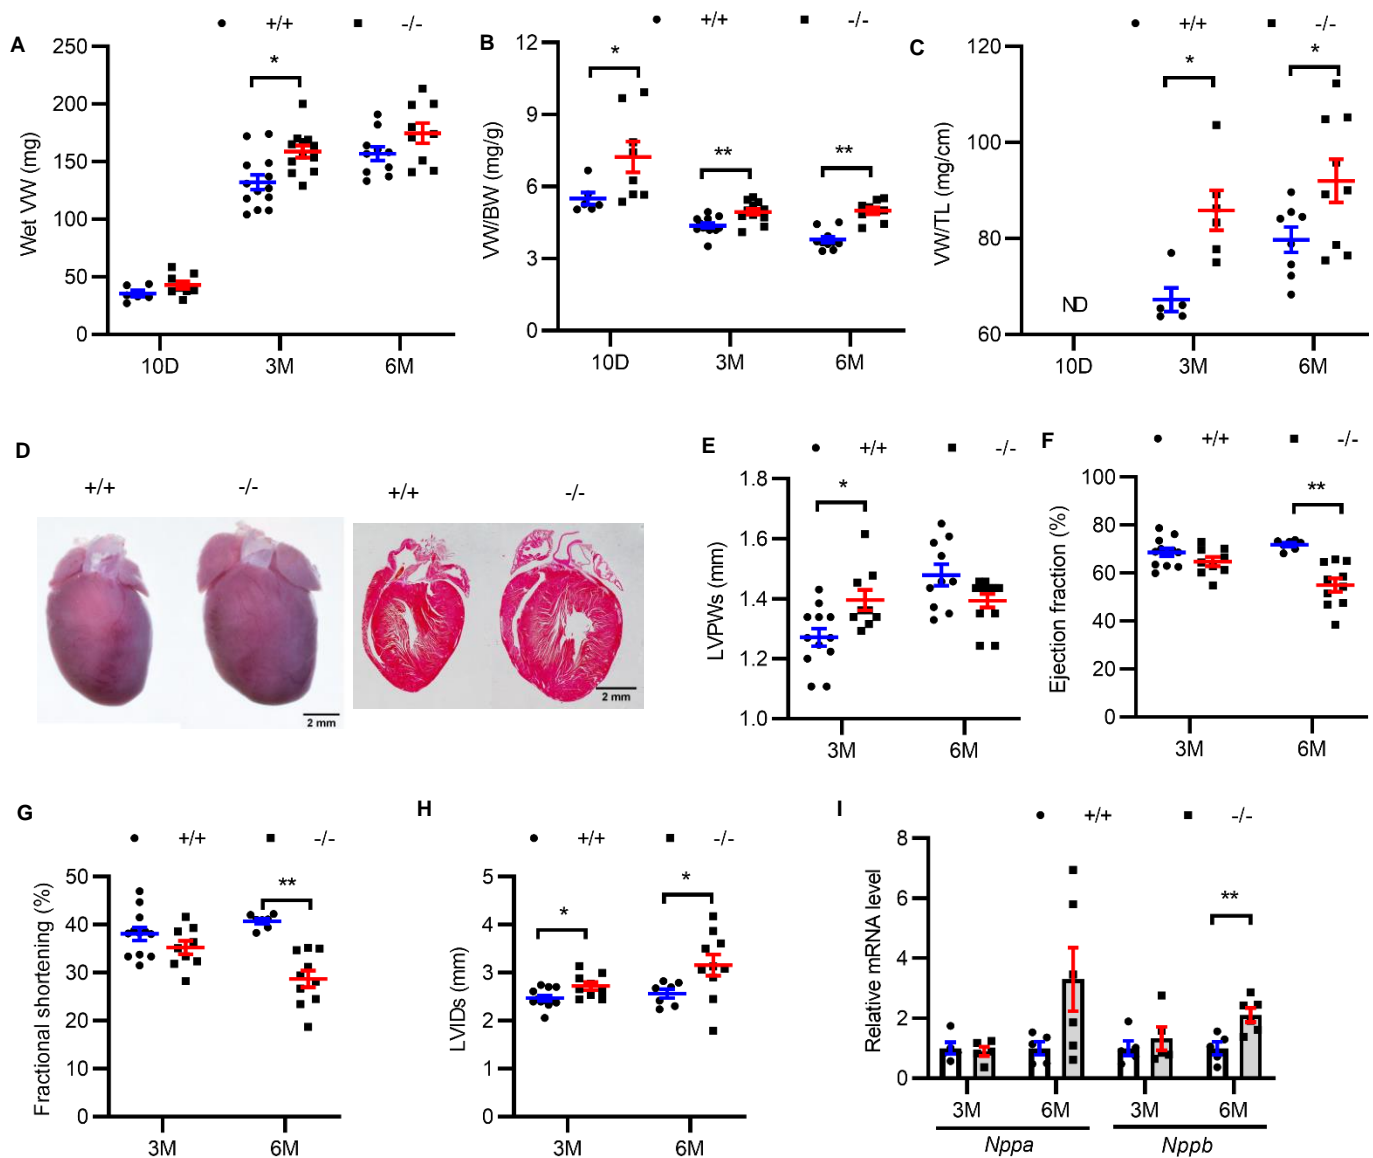

**Supplemental Figure 1. Lipodystrophic  $Bsc12^{-/-}$  mice develop cardiac hypertrophy and age-dependent cardiomyopathy. (A-C)** Wet ventricle weight (VW), ratio of VW to BW and ratio of VW to tibia length (TL) in postnatal 10 days, 3 and 6 months (M) old male  $Bsc12^{+/+}$  ( $+/+$ ) and  $Bsc12^{-/-}$  ( $-/-$ ) mice ( $n=6-10$ /group). ND: not determined. **(D)** Whole heart and the four-chamber view of the hearts showed the morphological features of ventricles in 3M old male mice. Scale bar = 2 mm. **(E-H)** Left ventricular posterior wall thickness at systole (LVPWs), ejection fraction, fractional shortening and left ventricular internal diameter at systole (LVIDs) in 3M and 6M old male mice ( $n=7-10$ /group). **(I)** RT-PCR analysis of atrial natriuretic peptide ( $Nppa$ ) and brain natriuretic peptide ( $Nppb$ ) gene expression in ventricles of nonfasting 3M and 6M old male mice ( $n=5-6$ /group). \*:  $p < 0.05$ ; \*\*:  $p < 0.005$  vs  $+/+$  mice. Multiple  $t$  tests after correction using the Holm-Sidak method.

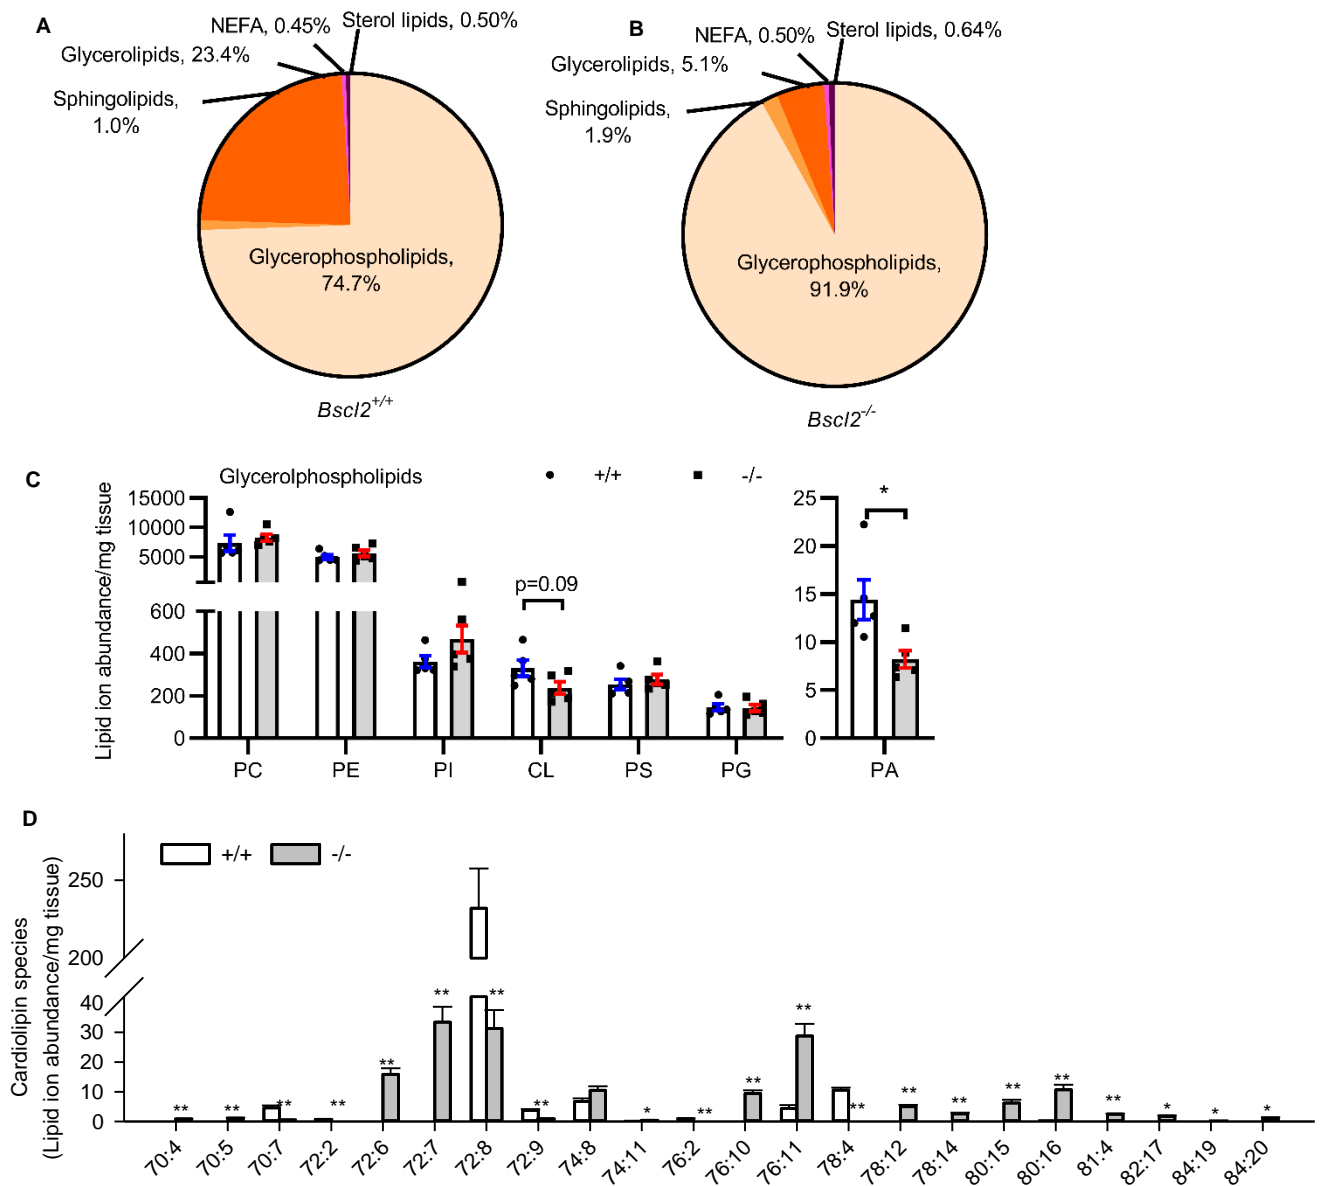

**Supplemental Figure 2. Global lipidomic analysis of ventricles from nonfasting 6 months old male *Bsc12*<sup>+/+</sup> and *Bsc12*<sup>-/-</sup> mice by shotgun mass spectrometry. (A-B)** Pie chart representing the distribution of summed ion abundances of glycerolipid, glycerophospholipid, sphingolipid, nonesterified fatty acid (NEFA), and sterol lipid classes, for all lipids detected in (A) *Bsc12*<sup>+/+</sup> and (B) *Bsc12*<sup>-/-</sup> ventricles. The area of each pie chart is proportional to the total lipid ion abundance normalized to tissue weight. (C) The total lipid ion abundances for glycerophospholipids including phosphatidylcholine (PC), phosphatidylethanolamine (PE), phosphatidylinositol (PI), cardiolipin (CL), phosphatidylserine (PS), phosphatidylglycerol (PG) and phosphatidic acid (PA). (D) The lipid ion abundances for 22 CL lipid species. All the lipid ion abundances in C-D were normalized to tissue weight. n=5 with each pooled from 3 animals. \*: P< 0.05; \*\*: P< 0.005. Multiple *t* tests after correction using the Holm-Sidak method.

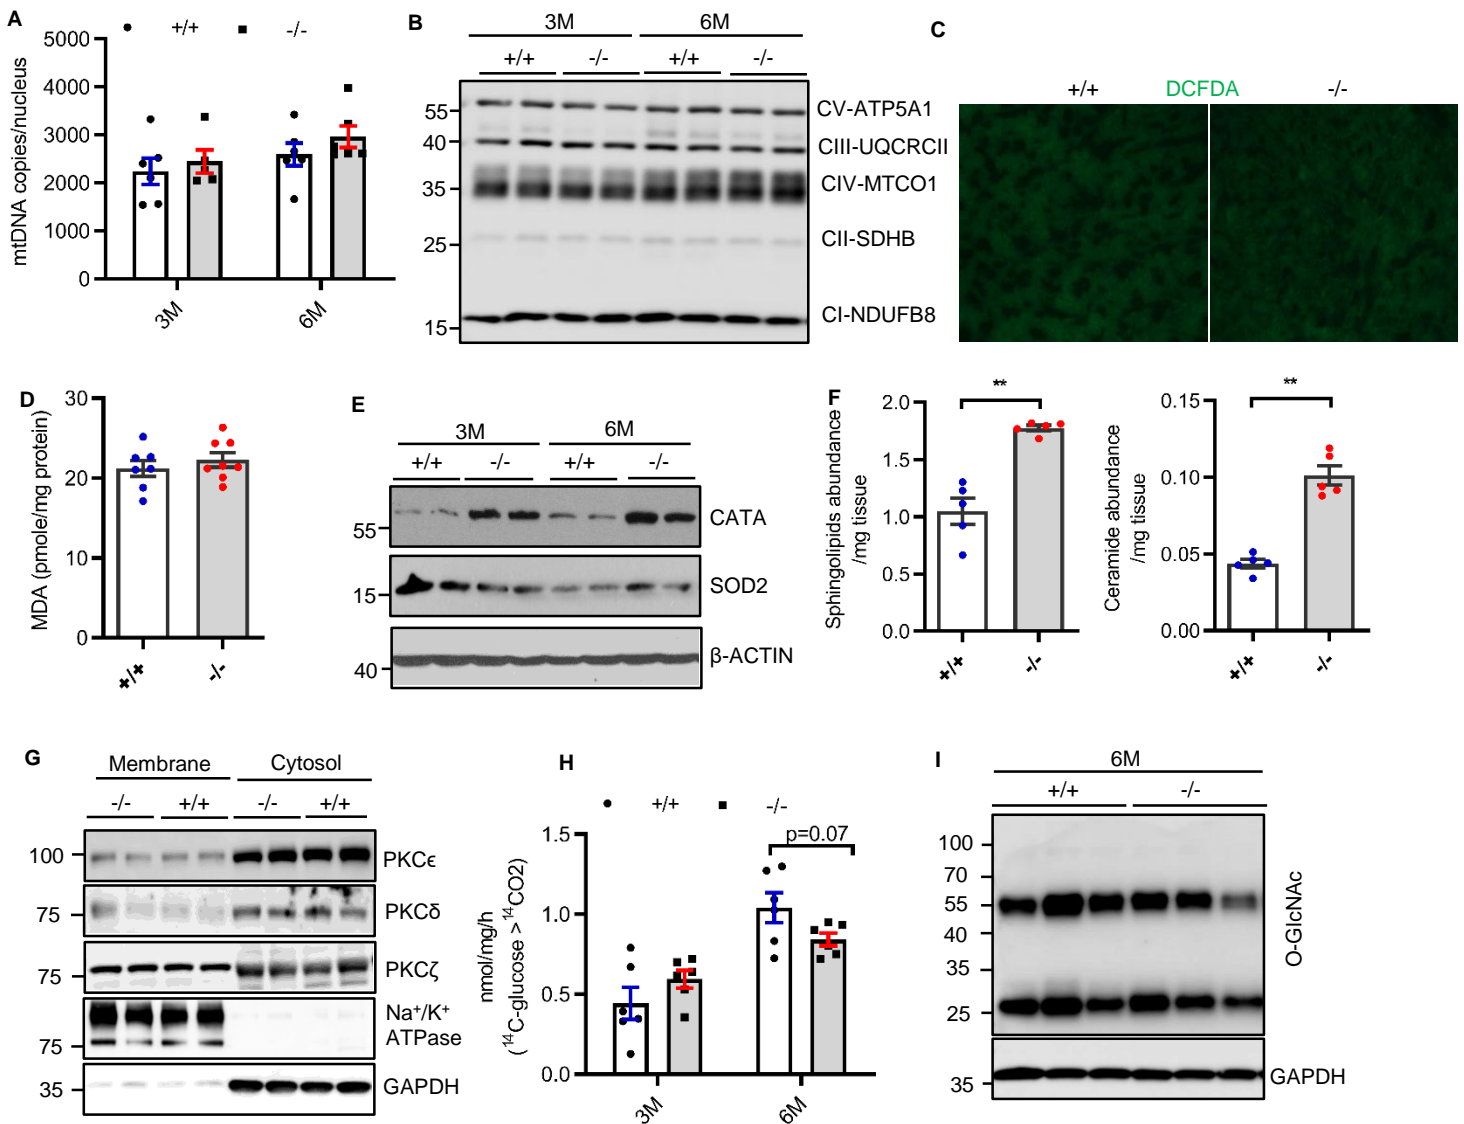

**Supplemental Figure 3. BSLC2 deletion did not induce mitochondrial biogenesis, oxidative stress and ceramide-mediated lipotoxicity in hearts.** (A-B) Mitochondria DNA copies/nucleus and protein expression of all five electron transport chain (ETC) complexes including NDUFB8 (complex I), SDHB (complex II), UQCRCII (complex III), MTCO1 (complex IV) and ATP5A1 (complex V) as detected by OXPHOS antibody cocktails in hearts of 3M and 6M old nonfasting male *Bsc12*<sup>+/+</sup> (+/+) and *Bsc12*<sup>-/-</sup> (-/-) mice. n=4-6/group. (C-D) 2',7'-dichlorofluorescein diacetate (DCFDA) staining to examine ROS production (C) and MDA measurements (D) in ventricles of 6M old male *Bsc12*<sup>+/+</sup> and *Bsc12*<sup>-/-</sup> mice (n=7-8/group). (E) Representative western blot analyses of antioxidant enzymes [Catalase (CATA) and SOD2] in hearts of 3M and 6M old male *Bsc12*<sup>+/+</sup> and *Bsc12*<sup>-/-</sup> mice. n=4/group. (F) The lipid ion abundances (normalized to tissue weight) for sphingomyelin and ceramide in ventricles of 6M old male mice (n=5 with each pooled from 3 animals). (G) Representative western blot of membrane translocation of PKC isoforms in 6M old nonfasting male *Bsc12*<sup>+/+</sup> and *Bsc12*<sup>-/-</sup> mice. n=4/group. (H) CO<sub>2</sub> production after incubating heart crude mitochondrial fraction with <sup>14</sup>C-glucose (3M and 6M old male *Bsc12*<sup>+/+</sup> and *Bsc12*<sup>-/-</sup> mice. n=4/group in triplicates). (I) Representative western blot of ventricle protein o-GlcNAcylation in 6M old male *Bsc12*<sup>+/+</sup> and *Bsc12*<sup>-/-</sup> mice under nonfasting states (n=3/group). \*: p < 0.05, \*\*: p < 0.005 vs +/+ mice. Unpaired *t* test.

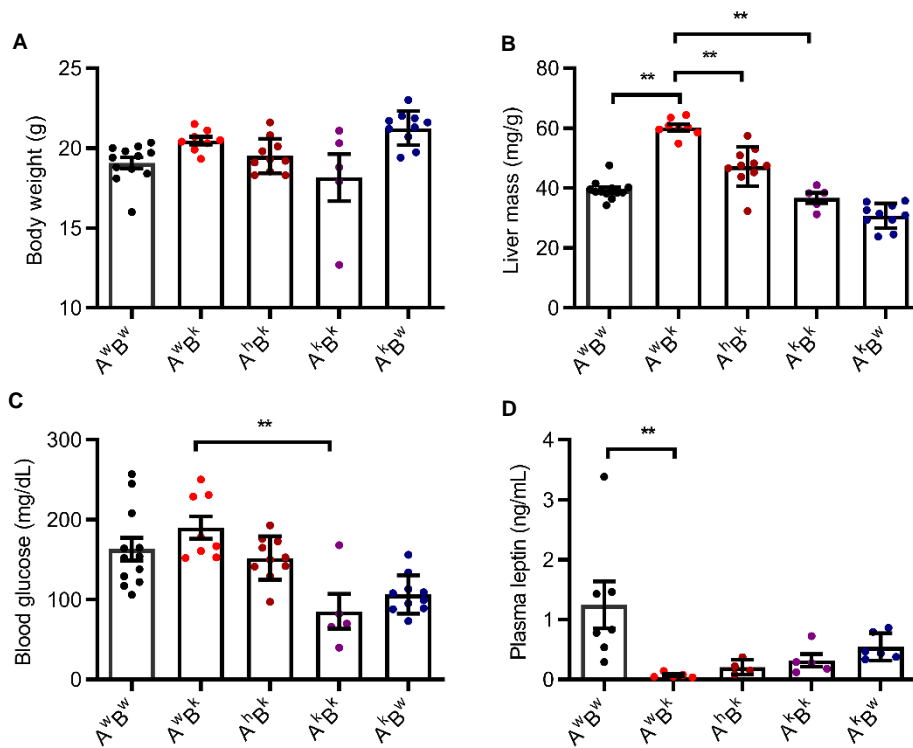

**Supplemental Figure 4. ATGL inactivation ameliorates metabolic disorders in *Bscl2*<sup>-/-</sup> mice.**

(A-D) BW, liver weight as normalized to BW, blood glucose and plasma leptin levels were measured in 4h fasted five groups of 10 week old female *Atgl*<sup>+/+</sup>*Bscl2*<sup>+/+</sup> ( $A^wB^w$ ), *Atgl*<sup>+/+</sup>*Bscl2*<sup>-/-</sup> ( $A^wB^k$ ), *Atgl*<sup>+/+</sup>*Bscl2*<sup>-/-</sup> ( $A^hB^k$ ), *Atgl*<sup>-/-</sup>*Bscl2*<sup>-/-</sup> ( $A^kB^k$ ) and *Atgl*<sup>-/-</sup>*Bscl2*<sup>+/+</sup> ( $A^kB^w$ ) littermates. n=4-12/group. Limited numbers of male  $A^kB^k$  mice were obtained. But similar extent of rescue of metabolic parameters was observed in male  $A^hB^k$  and  $A^kB^k$  mice. \*: p< 0.05; \*\*: p< 0.005. One-way ANOVA with Dunnett's multiple comparisons correction.

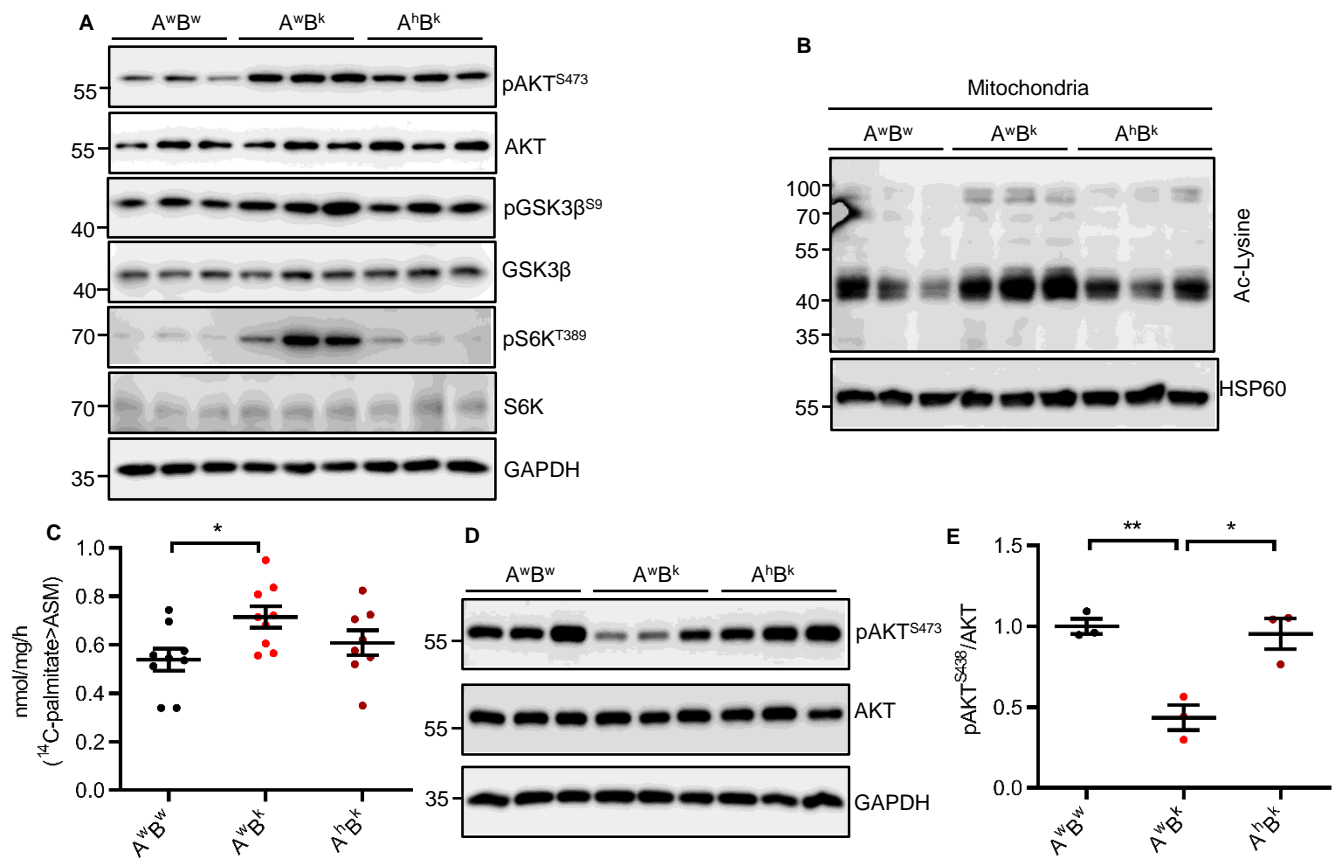

**Supplemental Figure 5. Partial inactivation of ATGL ameliorates cardiac hypertrophic signaling, metabolic inflexibility and insulin resistance in *Bsc12*<sup>-/-</sup> mice.** (A-B) Representative western blotting in whole heart and isolated mitochondria (n=3/group). (C) Acid soluble metabolites (ASM) production after incubating heart crude mitochondrial fraction with <sup>14</sup>C-palmitate. 6M old *Atgl*<sup>+/+</sup>*Bsc12*<sup>+/+</sup> (A<sup>w</sup>B<sup>w</sup>), *Atgl*<sup>+/+</sup>*Bsc12*<sup>-/-</sup> (A<sup>w</sup>B<sup>k</sup>) and *Atgl*<sup>-/-</sup>*Bsc12*<sup>-/-</sup> (A<sup>h</sup>B<sup>k</sup>) male mice were used with n# indicated in each bar. (D-E) AKT phosphorylation at Ser473 and ratio of pAKT/total AKT in hearts of 10 week old A<sup>w</sup>B<sup>w</sup>, A<sup>w</sup>B<sup>k</sup> and A<sup>h</sup>B<sup>k</sup> male mice after i.p. injection of Humulin for 15 min. \*: p < 0.05, \*\*: p < 0.005. One-way ANOVA with Dunnett's multiple comparisons correction.

**Table S1. Differentially expressed genes (267) in hearts from 10 week old 4 h fasted female *Bsc12*<sup>+/+</sup> and *Bsc12*<sup>-/-</sup> mice with (0.5 < Log 2 < -0.5), adjusted p value < 0.05 (n=3 for each group pooled from 9 animals).**

| Entrezgene | Gene name_ID   | LogFC | <i>Bsc12</i> <sup>+/+</sup><br>(Log10) | <i>Bsc12</i> <sup>-/-</sup><br>(Log10) | Adj.P.Val.  |
|------------|----------------|-------|----------------------------------------|----------------------------------------|-------------|
| 329977     | Fhad1          | 2.518 | -2.716                                 | -0.065                                 | 0.0229028   |
| 13616      | Edn3           | 2.445 | 0.163                                  | 2.669                                  | 4.92E-05    |
| 114249     | Npnt           | 2.021 | -0.493                                 | 1.299                                  | 0.04655838  |
| 18124      | Nr4a3          | 1.739 | 3.679                                  | 5.513                                  | 0.004804049 |
| 20497      | Slc12a3        | 1.505 | -0.309                                 | 1.262                                  | 0.01184061  |
| 433766     | Trim63         | 1.443 | 7.996                                  | 9.416                                  | 0.000133717 |
| 17389      | Mmp16          | 1.429 | -1.063                                 | 0.344                                  | 0.01583094  |
| 74574      | Lvrn           | 1.354 | 0.666                                  | 2.007                                  | 0.004804049 |
| 242484     | D630039A03Rik  | 1.276 | -0.095                                 | 1.110                                  | 0.0174732   |
| 218038     | Amph           | 1.246 | 0.589                                  | 1.859                                  | 0.002337585 |
| 194231     | Cnksr1         | 1.215 | 4.315                                  | 5.537                                  | 0.002520509 |
| 53412      | Ppp1r3c        | 1.149 | 6.395                                  | 7.587                                  | 0.00280357  |
| 108100     | Baiap2         | 1.132 | 3.752                                  | 4.843                                  | 0.004804049 |
| 78321      | Ankrd23 (DARP) | 1.122 | 7.588                                  | 8.707                                  | 0.002770182 |
| 241226     | Itga8          | 1.119 | 2.495                                  | 3.459                                  | 0.02454969  |
| 69784      | 1500009L16Rik  | 1.117 | 0.181                                  | 1.327                                  | 0.03631017  |
| 231070     | Insig1         | 1.112 | 3.874                                  | 4.949                                  | 0.002967186 |
| 70556      | Slc25a33       | 1.112 | 5.132                                  | 6.267                                  | 0.02403866  |
| 12583      | Cdo1           | 1.105 | 1.404                                  | 2.516                                  | 0.004804049 |
| 74646      | Spsb1          | 1.069 | 5.904                                  | 6.965                                  | 0.000733538 |
| 15200      | Hbegf          | 1.068 | 4.020                                  | 5.070                                  | 0.000236787 |
| 17174      | Masp1          | 1.066 | 2.283                                  | 3.373                                  | 0.01646861  |
| 328967     | Arhgef37       | 1.060 | 2.357                                  | 3.405                                  | 0.01969438  |
| 12372      | Casq1          | 1.054 | 2.581                                  | 3.679                                  | 0.02326597  |
| 384783     | Irs2           | 1.048 | 4.955                                  | 6.124                                  | 0.04330626  |
| 94214      | Spock2         | 1.028 | 4.473                                  | 5.464                                  | 0.03711377  |
| 223513     | Abra           | 1.021 | 5.255                                  | 6.296                                  | 0.01569992  |
| 14560      | Gdf10          | 1.011 | 1.052                                  | 1.989                                  | 0.02335676  |
| 237979     | Sdk2           | 1.000 | 0.753                                  | 1.712                                  | 0.006618718 |
| 70652      | Tmem144        | 0.988 | 5.038                                  | 5.993                                  | 0.005641247 |
|            | Gm5532         | 0.986 | 6.222                                  | 7.196                                  | 0.002839451 |
| 53623      | Gria3          | 0.981 | 0.226                                  | 1.205                                  | 0.02228742  |
| 227545     | Proser2        | 0.975 | 2.874                                  | 3.843                                  | 0.002967186 |
| 218215     | Rnf144b        | 0.973 | 5.706                                  | 6.696                                  | 0.002967186 |
| 50709      | Hist1h1e       | 0.964 | 0.140                                  | 1.093                                  | 0.03511071  |
| 107765     | Ankrd1 (CARP)  | 0.962 | 9.186                                  | 10.221                                 | 0.01660574  |
| 105171     | Arrdc3         | 0.962 | 6.176                                  | 7.145                                  | 0.008046806 |

|        |             |       |        |        |             |
|--------|-------------|-------|--------|--------|-------------|
| 57436  | Gabarapl1   | 0.960 | 6.837  | 7.746  | 0.01380389  |
| 320802 | Ifitm10     | 0.952 | -0.575 | 0.348  | 0.03449257  |
| 13197  | Gadd45a     | 0.934 | 3.257  | 4.117  | 0.01608785  |
| 103988 | Gck         | 0.928 | 4.905  | 5.848  | 0.02249787  |
| 67434  | Ankrd33b    | 0.920 | 5.403  | 6.316  | 0.004804049 |
| 107869 | Cth         | 0.908 | 1.302  | 2.175  | 0.01608785  |
| 66270  | Fam134b     | 0.896 | 8.204  | 9.067  | 0.001207942 |
| 14229  | Fkbp5       | 0.888 | 6.400  | 7.279  | 0.03660511  |
| 20817  | Srpk2       | 0.887 | 5.992  | 6.952  | 0.02882628  |
| 55990  | Fmo2        | 0.879 | 5.964  | 6.835  | 0.009109733 |
| 140742 | Sesn1       | 0.872 | 7.605  | 8.472  | 0.000189148 |
| 11668  | Aldh1a1     | 0.867 | 4.426  | 5.239  | 0.01036277  |
| 78943  | Ern1        | 0.858 | 4.981  | 5.805  | 0.001312146 |
| 64209  | Herpud1     | 0.854 | 8.792  | 9.608  | 0.00527106  |
| 237560 | Lrrc10      | 0.854 | 7.363  | 8.232  | 0.000209586 |
| 15982  | Ifrd1       | 0.853 | 5.357  | 6.198  | 0.02238151  |
| 50934  | Slc7a8      | 0.835 | 2.426  | 3.262  | 0.04237831  |
| 22190  | Ubc         | 0.829 | 6.516  | 7.291  | 0.005878584 |
| 68732  | Carmil1     | 0.829 | 2.223  | 3.059  | 0.009710378 |
| 223272 | Itgbl1      | 0.818 | 2.653  | 3.486  | 0.0272806   |
| 242700 | Ifnlr1      | 0.809 | 2.341  | 3.061  | 0.01801309  |
| 13143  | Dapk2       | 0.789 | 1.753  | 2.565  | 0.006574791 |
| 13078  | Cyp1b1      | 0.780 | 2.610  | 3.354  | 0.04201207  |
| 228564 | Frmf5       | 0.760 | 6.989  | 7.792  | 0.006318217 |
| 234878 | Map3k21     | 0.759 | 1.157  | 1.803  | 0.04600798  |
| 58220  | Pard6b      | 0.757 | 1.245  | 1.940  | 0.0278308   |
| 19017  | Ppargc1a    | 0.752 | 7.342  | 8.088  | 0.02732345  |
| 240817 | Teddm2      | 0.751 | 1.050  | 1.809  | 0.04713166  |
| 17872  | Ppp1r15a    | 0.748 | 4.611  | 5.356  | 0.03449257  |
| 16011  | Igfbp5      | 0.745 | 6.975  | 7.721  | 0.02025857  |
| 15939  | Ier5        | 0.735 | 4.796  | 5.571  | 0.02241572  |
| 216805 | Fln         | 0.735 | 6.220  | 6.963  | 0.002840315 |
| 77864  | Ypel2       | 0.726 | 4.349  | 5.037  | 0.00280357  |
| 17748  | Mt1         | 0.723 | 8.400  | 9.060  | 0.04364039  |
| 17901  | Myl1 (Mlc1) | 0.712 | 3.064  | 3.752  | 0.02025857  |
| 71862  | Gpr160      | 0.711 | 1.968  | 2.620  | 0.01958252  |
| 15360  | Hmgcs2      | 0.708 | 4.126  | 4.852  | 0.006276771 |
| 12323  | Camk2b      | 0.708 | 3.466  | 4.209  | 0.000666055 |
| 14645  | Glul        | 0.705 | 9.470  | 10.133 | 0.001546806 |
| 18583  | Pde7a       | 0.703 | 6.412  | 7.119  | 0.01082946  |
| 93677  | Lmod2       | 0.696 | 9.698  | 10.406 | 0.009109733 |
| 23972  | Papss2      | 0.692 | 3.909  | 4.567  | 0.008495516 |
| 14325  | Ftl1        | 0.687 | 4.244  | 4.887  | 0.03346039  |
| 70892  | Ttll7       | 0.673 | 3.854  | 4.530  | 0.004804049 |
| 243362 | Stard13     | 0.661 | 5.770  | 6.430  | 0.000733538 |



|        |          |       |       |       |             |
|--------|----------|-------|-------|-------|-------------|
| 77057  | Ston1    | 0.652 | 3.911 | 4.540 | 0.01655162  |
| 72961  | Slc17a7  | 0.645 | 3.941 | 4.552 | 0.0187436   |
| 58909  | Fam13a   | 0.641 | 4.874 | 5.523 | 0.02460853  |
| 209268 | Igsf1    | 0.639 | 3.342 | 4.040 | 0.01546733  |
| 235493 | Fam214a  | 0.638 | 6.263 | 6.871 | 0.02377718  |
| 66277  | Klf15    | 0.635 | 6.673 | 7.307 | 0.01241928  |
| 19885  | Rorc     | 0.634 | 5.050 | 5.705 | 0.01130875  |
| 18760  | Prkd1    | 0.631 | 2.579 | 3.216 | 0.006574791 |
| 19122  | Prnp     | 0.622 | 6.842 | 7.480 | 0.00527106  |
| 21817  | Tgm2     | 0.617 | 7.939 | 8.559 | 0.004804049 |
| 239017 | Ogdhl    | 0.616 | 7.291 | 7.955 | 0.03449257  |
| 12013  | Bach1    | 0.614 | 6.066 | 6.665 | 0.006574791 |
| 235661 | Dync1li1 | 0.614 | 5.940 | 6.566 | 0.004804049 |
| 18640  | Pfkfb2   | 0.611 | 6.388 | 7.021 | 0.04466122  |
| 108767 | Pnrc1    | 0.608 | 6.677 | 7.265 | 0.01660762  |
| 54630  | Prickle3 | 0.608 | 5.289 | 5.939 | 0.01183097  |
| 233977 | Ppfia1   | 0.606 | 6.049 | 6.677 | 0.01703651  |
| 27494  | Amot     | 0.603 | 3.774 | 4.433 | 0.03392254  |
| 72401  | Slc43a1  | 0.602 | 1.664 | 2.249 | 0.04237831  |
| 16476  | Jun      | 0.600 | 5.625 | 6.180 | 0.004804049 |
| 67216  | Mboat2   | 0.596 | 3.183 | 3.816 | 0.03392763  |
| 271424 | Ip6k3    | 0.596 | 3.487 | 4.127 | 0.02241784  |
| 18712  | Pim1     | 0.588 | 3.589 | 4.116 | 0.04330626  |
| 12778  | Ackr3    | 0.584 | 6.042 | 6.634 | 0.02299809  |
| 99929  | Tiparp   | 0.582 | 4.161 | 4.747 | 0.008163069 |
| 71371  | Arid5b   | 0.582 | 4.741 | 5.319 | 0.00674268  |
| 56772  | Mllt11   | 0.578 | 2.858 | 3.439 | 0.008388528 |
| 229906 | Gtf2b    | 0.574 | 3.401 | 3.970 | 0.04115766  |
| 13190  | Dct      | 0.572 | 2.712 | 3.219 | 0.04566755  |
| 20648  | Snta1    | 0.566 | 6.664 | 7.232 | 0.001546806 |
| 71393  | Kctd6    | 0.564 | 3.131 | 3.673 | 0.01928051  |
| 105859 | Csdc2    | 0.559 | 6.252 | 6.829 | 0.03447596  |
|        | Zfp469   | 0.558 | 1.786 | 2.342 | 0.01958252  |
| 22436  | Xdh      | 0.547 | 7.701 | 8.233 | 0.001514647 |
| 330267 | Thsd7a   | 0.545 | 3.544 | 4.063 | 0.0324013   |
| 71865  | Fbxo30   | 0.545 | 4.895 | 5.424 | 0.008340809 |
| 76820  | Fam49a   | 0.542 | 3.230 | 3.754 | 0.02669578  |
| 19228  | Pth1r    | 0.540 | 3.102 | 3.633 | 0.02193354  |
| 269604 | Gpr157   | 0.535 | 6.446 | 6.995 | 0.00280357  |
| 78754  | Galnt15  | 0.535 | 5.475 | 5.969 | 0.02018545  |
| 17470  | Cd200    | 0.533 | 5.361 | 5.906 | 0.000864215 |
| 14245  | Lpin1    | 0.532 | 8.185 | 8.710 | 0.01184061  |
| 18081  | Ninj1    | 0.532 | 5.338 | 5.856 | 0.002208084 |
| 67731  | Fbxo32   | 0.530 | 8.582 | 9.093 | 0.04630743  |
| 215113 | Slc43a2  | 0.527 | 4.839 | 5.303 | 0.0241564   |

|        |               |        |       |        |             |
|--------|---------------|--------|-------|--------|-------------|
| 216505 | Pik3ip1       | 0.523  | 6.154 | 6.643  | 0.04630743  |
| 63955  | Cables1       | 0.521  | 2.909 | 3.431  | 0.03288852  |
| 70598  | Filip1        | 0.521  | 7.175 | 7.723  | 0.006204502 |
| 319876 | Cobll1        | 0.521  | 7.227 | 7.729  | 0.008554261 |
| 18175  | Nrap          | 0.519  | 9.741 | 10.268 | 0.004804049 |
| 14681  | Gnao1         | 0.518  | 4.820 | 5.315  | 0.008595151 |
| 208449 | Sgms1         | 0.516  | 6.264 | 6.781  | 0.004804049 |
| 19821  | Rnf2          | 0.514  | 4.180 | 4.699  | 0.01592996  |
| 107701 | Sf3b4         | 0.512  | 1.586 | 2.050  | 0.027111718 |
| 330812 | Rnf150        | -0.503 | 5.766 | 5.324  | 0.0264835   |
| 232089 | Elmod3        | -0.506 | 4.610 | 4.110  | 0.005878584 |
| 193736 | Zbtb12        | -0.506 | 2.674 | 2.200  | 0.04120065  |
| 80906  | Kcnip2        | -0.510 | 7.768 | 7.243  | 0.008163069 |
| 78619  | Zfp449        | -0.512 | 2.766 | 2.311  | 0.04075728  |
| 70021  | Nt5dc2        | -0.518 | 3.629 | 3.098  | 0.006276771 |
| 14584  | Gfpt2         | -0.527 | 3.855 | 3.359  | 0.03392763  |
| 20520  | Slc22a5       | -0.529 | 4.682 | 4.118  | 0.008349744 |
| 66412  | Arrdc4        | -0.530 | 3.179 | 2.698  | 0.03449257  |
|        | A430046D13Rik | -0.532 | 3.978 | 3.474  | 0.007336289 |
| 230837 | Asap3         | -0.532 | 4.055 | 3.517  | 0.0132319   |
| 60425  | Doc2g         | -0.535 | 6.183 | 5.667  | 0.01415787  |
| 30963  | Hacd1         | -0.537 | 4.111 | 3.580  | 0.02614695  |
| 11554  | Adrb1         | -0.540 | 4.161 | 3.634  | 0.01726525  |
| 56752  | Aldh9a1       | -0.543 | 5.647 | 5.088  | 0.004804049 |
| 77521  | Mtus2         | -0.545 | 7.323 | 6.779  | 0.00973912  |
| 14370  | Fzd8          | -0.549 | 3.401 | 2.837  | 0.02193354  |
| 14872  | Gstt2         | -0.552 | 2.751 | 2.175  | 0.0349696   |
| 72421  | Ttc30b        | -0.552 | 3.603 | 3.032  | 0.01574645  |
| 244416 | Ppp1r3b       | -0.554 | 4.458 | 3.901  | 0.03578611  |
| 50916  | Irx4          | -0.555 | 4.582 | 4.021  | 0.04119556  |
| 20667  | Sox12         | -0.564 | 4.338 | 3.840  | 0.004804049 |
| 67468  | Mmd           | -0.569 | 5.341 | 4.749  | 0.005123964 |
| 19294  | Nectin2       | -0.571 | 4.733 | 4.135  | 0.01566957  |
| 22317  | Vamp1         | -0.572 | 3.887 | 3.285  | 0.03149533  |
|        | Mir99ahg      | -0.577 | 3.684 | 3.109  | 0.01958252  |
| 17286  | Meox2         | -0.584 | 3.760 | 3.217  | 0.03392763  |
| 14373  | G0s2          | -0.585 | 4.375 | 3.736  | 0.03449257  |
| 14453  | Gas2          | -0.589 | 2.028 | 1.474  | 0.02403866  |
| 110639 | Prps2         | -0.590 | 3.836 | 3.218  | 0.001865608 |
| 20787  | Srebf1        | -0.593 | 5.635 | 5.050  | 0.000193945 |
| 228966 | Ppp1r3d       | -0.594 | 4.072 | 3.437  | 0.0174732   |
| 246707 | Emilin2       | -0.596 | 6.092 | 5.519  | 0.01582507  |
|        | 1010001N08Rik | -0.618 | 3.176 | 2.578  | 0.006318217 |
| 228019 | Mettl8        | -0.621 | 2.383 | 1.760  | 0.0110831   |
| 230157 | Tmeff1        | -0.624 | 2.880 | 2.244  | 0.008163069 |

|        |               |        |       |       |             |
|--------|---------------|--------|-------|-------|-------------|
| 71091  | Cdkl1         | -0.626 | 3.289 | 2.712 | 0.02403866  |
| 353169 | Slc2a12       | -0.626 | 2.833 | 2.246 | 0.01181867  |
| 66528  | Smim5         | -0.628 | 3.000 | 2.379 | 0.04797793  |
| 170826 | Ppargc1b      | -0.640 | 5.372 | 4.770 | 0.03770677  |
| 11419  | Asic1         | -0.645 | 1.813 | 1.175 | 0.04370804  |
| 17385  | Mmp11         | -0.648 | 2.310 | 1.713 | 0.01138986  |
| 73750  | Whrn          | -0.656 | 5.724 | 5.041 | 0.006533397 |
|        | Gm26795       | -0.665 | 2.528 | 1.916 | 0.02403866  |
| 18208  | Ntn1          | -0.673 | 7.272 | 6.606 | 0.000209586 |
| 18559  | Pctp          | -0.675 | 1.979 | 1.367 | 0.04330626  |
| 70083  | Metrn         | -0.678 | 1.669 | 0.929 | 0.03347302  |
| 18575  | Pde1c         | -0.678 | 6.159 | 5.532 | 0.02241572  |
| 108153 | Adamts7       | -0.681 | 5.316 | 4.647 | 0.01577118  |
| 70445  | Cd248         | -0.686 | 3.968 | 3.313 | 0.007223075 |
| 22418  | Wnt5a         | -0.686 | 3.367 | 2.689 | 0.01577118  |
| 65079  | Rtn4r         | -0.696 | 2.331 | 1.726 | 0.04056746  |
| 71532  | Fam217b       | -0.698 | 4.352 | 3.661 | 0.003903393 |
| 56279  | Fam69b        | -0.705 | 3.683 | 2.954 | 0.000624478 |
| 11624  | Ahrr          | -0.708 | 2.466 | 1.844 | 0.03548647  |
| 11496  | Adam22        | -0.709 | 4.743 | 4.020 | 0.01040721  |
| 107895 | Mgat5         | -0.715 | 4.611 | 3.939 | 0.00527106  |
| 14349  | Fv1           | -0.716 | 3.341 | 2.664 | 0.01660762  |
| 243937 | Zfp536        | -0.716 | 2.629 | 1.838 | 0.02454969  |
| 242721 | Klhdc7a       | -0.719 | 2.144 | 1.488 | 0.008495516 |
| 73112  | Abrac1        | -0.733 | 2.834 | 2.034 | 0.006276771 |
| 13170  | Dbp           | -0.735 | 6.410 | 5.706 | 0.00527106  |
| 75216  | Cep128        | -0.738 | 3.648 | 2.911 | 0.006574791 |
| 105727 | Slc38a1       | -0.745 | 5.336 | 4.589 | 0.01082946  |
| 278507 | Wfikkn2       | -0.750 | 3.105 | 2.467 | 0.008980202 |
| 270190 | Ephb1         | -0.761 | 2.262 | 1.492 | 0.04620217  |
| 353208 | Zfp931        | -0.770 | 1.929 | 1.157 | 0.02249787  |
| 545276 | Gal3st3       | -0.779 | 3.772 | 3.021 | 0.03808889  |
| 68267  | Slc25a22      | -0.780 | 6.000 | 5.216 | 0.000209586 |
| 30878  | Apln          | -0.784 | 3.650 | 2.906 | 0.01504272  |
| 53871  | Pkd2l2        | -0.798 | 3.145 | 2.345 | 0.008163069 |
| 80903  | Fgf16         | -0.800 | 2.929 | 2.235 | 0.02154198  |
| 218763 | Lrrc3b        | -0.808 | 3.649 | 2.779 | 0.008984791 |
| 235611 | Plxnb1        | -0.830 | 6.735 | 5.945 | 0.000291976 |
| 282619 | Sbsn          | -0.833 | 1.673 | 0.910 | 0.04215561  |
| 19713  | Ret           | -0.834 | 2.758 | 1.999 | 0.02718017  |
| 217303 | Cd300a        | -0.840 | 1.322 | 0.460 | 0.04518618  |
| 21847  | Klf10         | -0.849 | 4.045 | 3.244 | 0.006908424 |
| 21788  | Tfpi          | -0.854 | 6.299 | 5.478 | 0.000566816 |
| 15490  | Hsd17b7       | -0.856 | 3.964 | 3.079 | 0.04201207  |
|        | 4921504A21Rik | -0.867 | 1.699 | 0.873 | 0.0382407   |

|        |               |        |        |        |             |
|--------|---------------|--------|--------|--------|-------------|
| 71911  | Bdh1          | -0.877 | 6.370  | 5.454  | 0.03961031  |
|        | 2310001H17Rik | -0.881 | 1.464  | 0.595  | 0.01629943  |
| 12477  | Ctla4         | -0.886 | 1.867  | 0.975  | 0.0272806   |
| 107934 | Celsr3        | -0.886 | 2.862  | 1.968  | 0.006276771 |
| 19735  | Rgs2          | -0.892 | 5.615  | 4.787  | 0.0459982   |
| 72514  | Fgfbp3        | -0.905 | 1.549  | 0.617  | 0.03515121  |
| 11987  | Slc7a1        | -0.910 | 6.319  | 5.466  | 0.000133717 |
| 56338  | Txnip         | -0.912 | 9.366  | 8.459  | 0.04219979  |
|        | B430212C06Rik | -0.920 | 1.657  | 0.762  | 0.02377718  |
| 11600  | Angpt1        | -0.945 | 5.080  | 4.125  | 0.03781937  |
| 74488  | Lrrc15        | -0.953 | 4.715  | 3.795  | 0.006574791 |
| 13637  | Efna2         | -0.954 | 0.584  | -0.413 | 0.02229697  |
| 12143  | Blk           | -0.964 | 1.442  | 0.579  | 0.03192593  |
| 56437  | Rrad          | -0.969 | 6.504  | 5.601  | 0.04031603  |
| 213236 | Dnd1          | -0.977 | 1.155  | 0.179  | 0.01377631  |
| 242022 | Frem2         | -1.019 | 4.943  | 3.975  | 0.009343039 |
| 12571  | Cdk6          | -1.027 | 2.900  | 2.023  | 0.003074969 |
| 15451  | Hpn           | -1.063 | 1.585  | 0.658  | 0.01502046  |
| 11550  | Adra1d        | -1.085 | 1.681  | 0.677  | 0.007304421 |
| 240660 | Slc35g1       | -1.094 | 1.517  | 0.371  | 0.006276771 |
| 78593  | Nrip3         | -1.107 | -0.724 | -1.819 | 0.04031603  |
| 216166 | Plk5          | -1.124 | 0.974  | -0.035 | 0.02377718  |
| 14695  | Gnb3          | -1.132 | 3.353  | 2.303  | 0.003903393 |
| 16855  | Lgals4        | -1.135 | 6.146  | 5.072  | 0.02977441  |
| 212190 | Ubxn10        | -1.136 | 2.754  | 1.776  | 0.03449257  |
|        | Gm10435       | -1.136 | 5.391  | 4.244  | 0.009527504 |
| 19286  | Pts           | -1.140 | 4.294  | 3.043  | 0.008163069 |
| 16780  | Lamb3         | -1.150 | 3.628  | 2.502  | 0.000133717 |
|        | Gm10603       | -1.151 | 2.587  | 1.442  | 0.000424927 |
|        | Gm12381       | -1.187 | 1.252  | 0.014  | 0.03392254  |
| 383787 | Ankrd63       | -1.215 | 1.922  | 0.667  | 0.04199571  |
| 227058 | Dnah7b        | -1.238 | 0.633  | -0.495 | 0.01731211  |
| 226922 | Kcnq5         | -1.324 | 0.299  | -1.113 | 0.04201207  |
| 57875  | Angptl4       | -1.343 | 3.375  | 2.019  | 0.004804049 |
| 280667 | Adam1b        | -1.356 | 0.696  | -0.532 | 0.04370804  |
| 14705  | Bscl2         | -1.427 | 4.066  | 2.607  | 1.57E-07    |
| 338417 | Scgb1c1       | -1.431 | 2.741  | 1.441  | 0.01759372  |
| 330938 | Dixdc1        | -1.473 | 4.349  | 2.602  | 0.02377718  |
| 20503  | Slc16a7       | -1.490 | 2.810  | 1.211  | 0.001207942 |
| 19734  | Rgs16         | -1.528 | 0.420  | -1.046 | 0.01352704  |
| 193003 | Pirt          | -1.579 | 3.695  | 2.099  | 0.004804049 |
| 71756  | Cpn2          | -1.650 | 1.662  | -0.046 | 0.00674268  |
| 108000 | Cenpf         | -1.659 | 5.008  | 3.355  | 0.001262084 |
| 20264  | Scn10a        | -1.664 | 0.491  | -1.012 | 0.006843893 |
| 78774  | Cfap61        | -1.697 | 1.190  | -0.417 | 0.001570376 |

|        |         |        |       |        |             |
|--------|---------|--------|-------|--------|-------------|
| 22229  | Ucp3    | -1.788 | 7.015 | 5.250  | 9.46E-08    |
| 381101 | Dnph1   | -2.065 | 0.922 | -1.224 | 0.004804049 |
| 13489  | Drd2    | -2.070 | 0.433 | -1.433 | 0.01608785  |
| 19329  | Rab17   | -2.147 | 0.388 | -1.811 | 0.02390765  |
|        | Gm14403 | -3.878 | 2.174 | -2.075 | 0.02496651  |

**Table S2. Plasma parameters and echocardiographic variables in 6 months old male  $A^wB^w$ ,  $A^wB^k$  and  $A^hB^k$  mice.**

|                                       | $A^wB^w$ (n=6) | $A^wB^k$ (n=6) | $A^hB^k$ (n=8) |
|---------------------------------------|----------------|----------------|----------------|
| <b>Body weight (g)</b>                | 36.6±1.8       | 36.1±1.1       | 34.1±0.86      |
| <b>Plasma glucose (mg/dL)</b>         | 176±7.7        | 351±38**       | 241±25*#       |
| <b>Cardiac TG (µg/mg)<sup>a</sup></b> | 1.11±0.23      | 0.38±0.01**    | 0.46±0.03**#   |
| <b>Heart rate (bpm)</b>               | 634±4          | 610±8          | 619±5          |
| <b>LV mass (mg)</b>                   | 100±3.3        | 111±6.2        | 117±4.9        |
| <b>Ejection fraction (%)</b>          | 71.2±1.12      | 55.7±2.3**     | 67.1±2.1#      |
| <b>LVPWd (mm)</b>                     | 0.88±0.04      | 0.92±0.02      | 0.92±0.03      |
| <b>LVPWs (mm)</b>                     | 1.51±0.04      | 1.34±0.05*     | 1.51±0.04#     |
| <b>LVAWd (mm)</b>                     | 0.79±0.02      | 0.73±0.04      | 0.78±0.04      |
| <b>LVAWs (mm)</b>                     | 1.43±0.02      | 1.27±0.05**    | 1.45±0.05#     |
| <b>LVIDd (mm)</b>                     | 4.0±0.15       | 4.16±0.11      | 4.16±0.07      |

Nonfasting mice were used. Data are mean values ± SEM. TG, triglyceride; LVPWd, LV posterior wall thickness in end-diastole; LVPWs, LV posterior wall thickness in end-systole; LVAWd, LV anterior wall thickness in end-diastole; LVAWs, LV anterior wall thickness in end-systole; LVIDd, LV internal diameter in end-diastole. \*:  $p < 0.05$  and \*\*:  $p < 0.005$  vs.  $A^wB^w$  mice; #:  $p < 0.05$  vs  $A^wB^k$  mice. a: data were obtained in 10 week old female mice after a 4 h fast.
